# Supplementary material for: A multiomics analysis-assisted deep learning model identifies a macrophage-oriented module as a potential therapeutic target in colorectal cancer
Source: PubMed Central journal article supplement — Cell Rep Med. 2024 Feb 1;5(2):101399. doi: 10.1016/j.xcrm.2024.101399 (PMC10897549; doi:10.1016/j.xcrm.2024.101399), 2024-02-01
Supplement: mmc1.pdf [file mmc1.pdf]

**Cell Reports Medicine, Volume 5**

**Supplemental information**

**A multiomics analysis-assisted deep learning model  
identifies a macrophage-oriented module as a  
potential therapeutic target in colorectal cancer**

**Xuanwen Bao, Qiong Li, Dong Chen, Xiaomeng Dai, Chuan Liu, Weihong Tian, Hangyu Zhang, Yuzhi Jin, Yin Wang, Jinlin Cheng, Chunyu Lai, Chanqi Ye, Shan Xin, Xin Li, Ge Su, Yongfeng Ding, Yangyang Xiong, Jindong Xie, Vincent Tano, Yanfang Wang, Wenguang Fu, Shuiguang Deng, Weijia Fang, Jianpeng Sheng, Jian Ruan, and Peng Zhao**

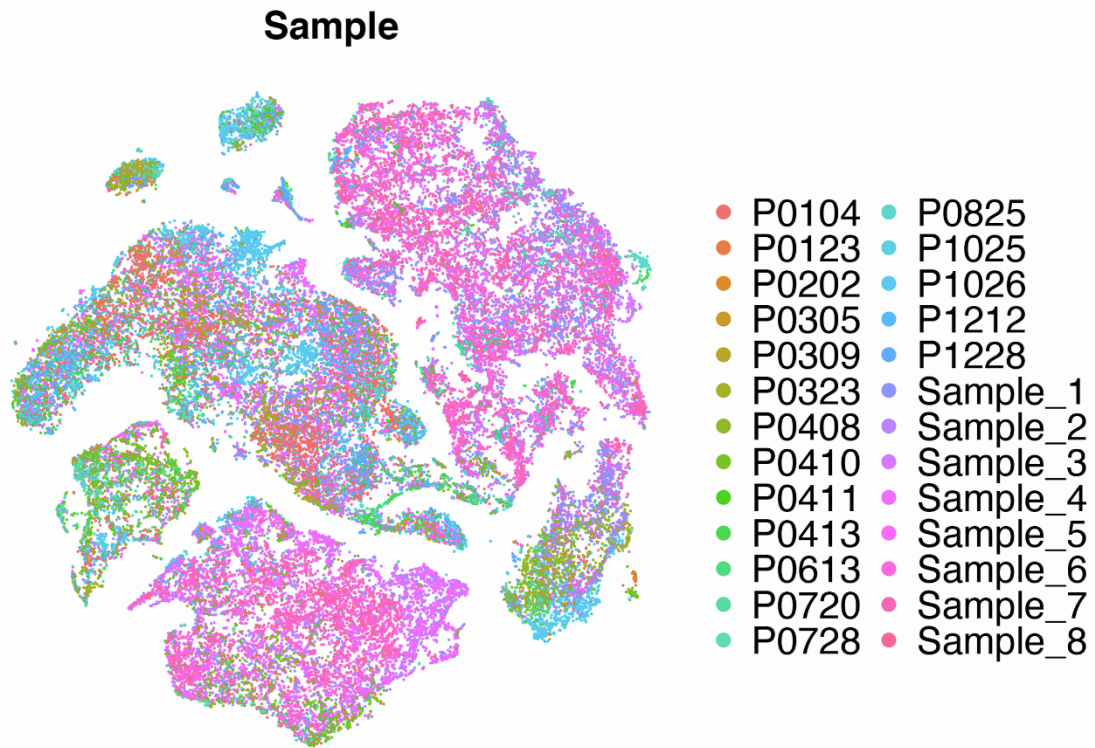

**Fig. S1: The t-SNE plot coloured by CRC patients, related to Figure 1.** A total of 24 patients were included for analysis. *t-SNE*: *t*-distributed stochastic neighbour embedding; *CRC*: colorectal cancer.

Figure S2

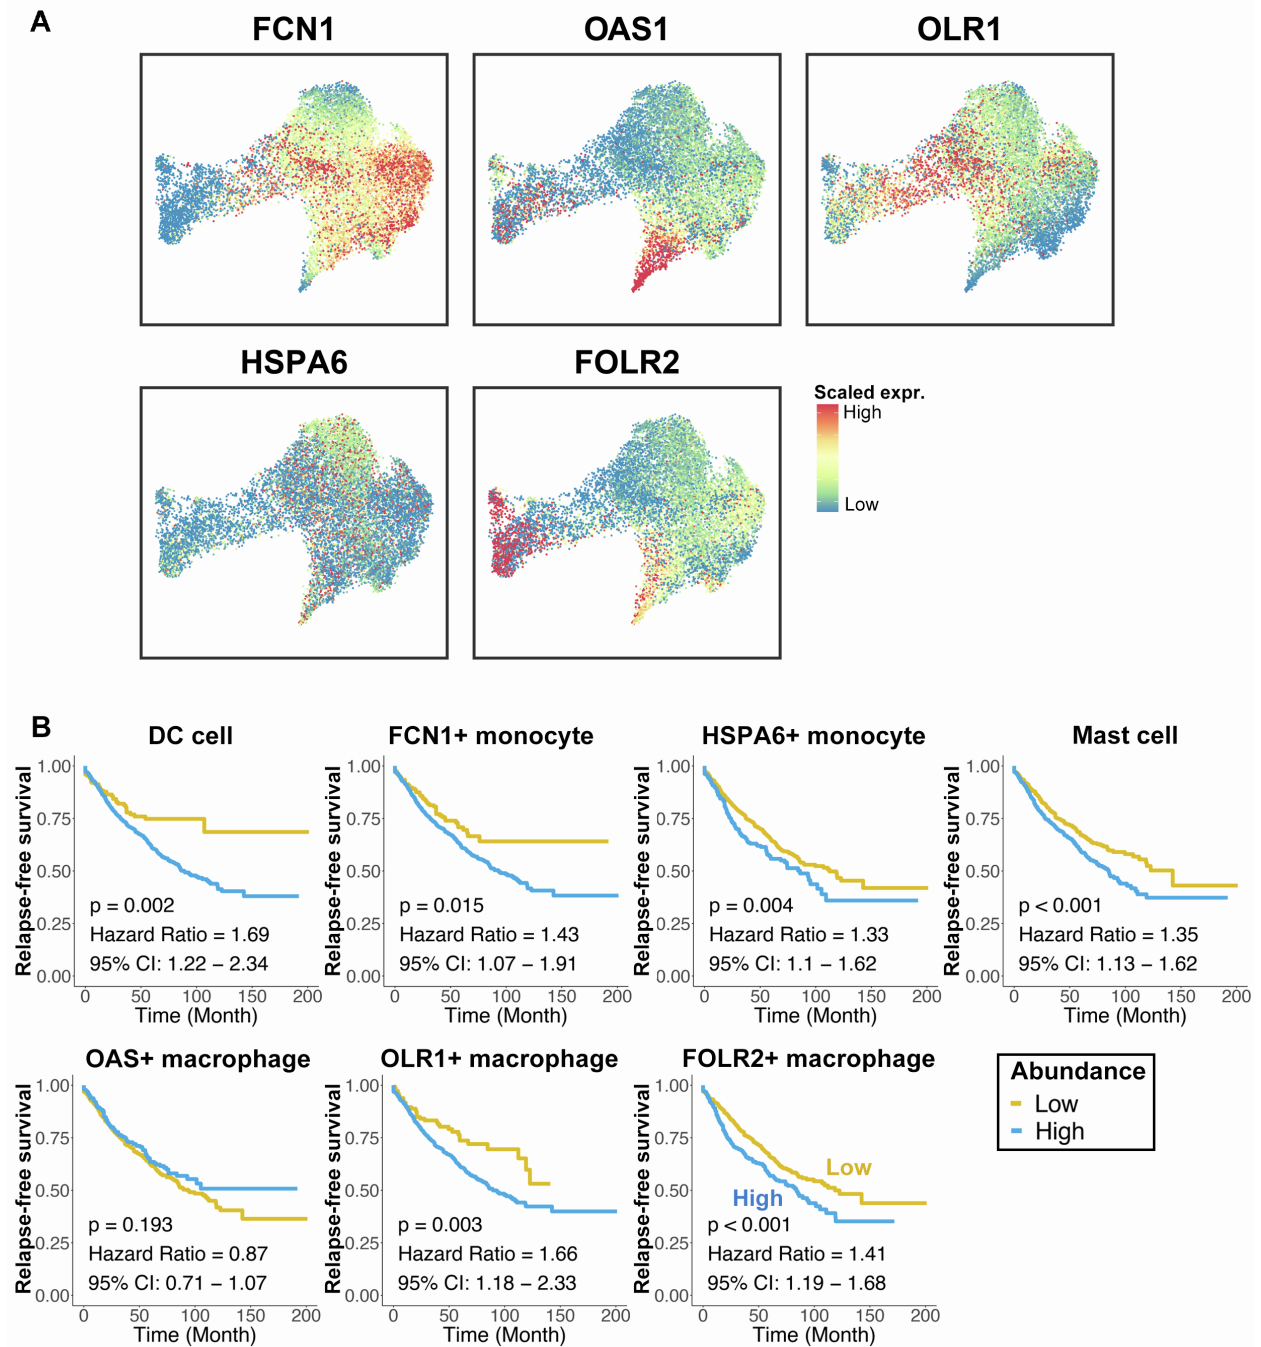

**Fig. S2: The monocyte/macrophage subpopulations and their prognostic values, related to Figure 2.** A.) The UMAP plot showing the expression level of the selected features in monocyte/macrophage subpopulations. B.) The association of DFS with the enrichment of each myeloid cell type. Gene signatures of myeloid cells were defined as the feature genes of each cell type and obtained from the scRNA-seq data (Pts n=1405). The cell abundance was calculated according to the gene signature for each cell type based on bulk transcriptome data using the GSVA method. UMAP: Uniform Manifold Approximation and Projection; DFS: disease-free survival; scRNA-Seq: single-cell RNA sequencing; GSVA: gene set variation analysis, Pts: patients.

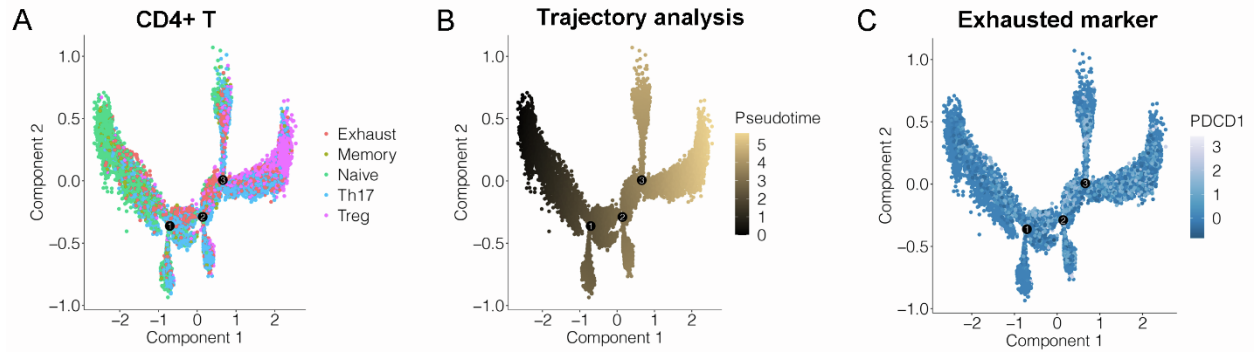

**Fig. S3: The CD4<sup>+</sup> T-cell subpopulations in CRC, related to Figure 4.** A.) Trajectory inference for 5 subclusters of CD4<sup>+</sup> T cells. B.) Trajectory inference with the pseudotime score for 5 subclusters of CD4<sup>+</sup> T cells. The colour key from black to gold indicates the pseudotime score from low to high. C.) Trajectory inference with PD-1 expression for 5 subclusters of CD4<sup>+</sup> T cells. The colour key from blue to white indicates PD-1 expression from low to high. *CRC: colorectal cancer.*

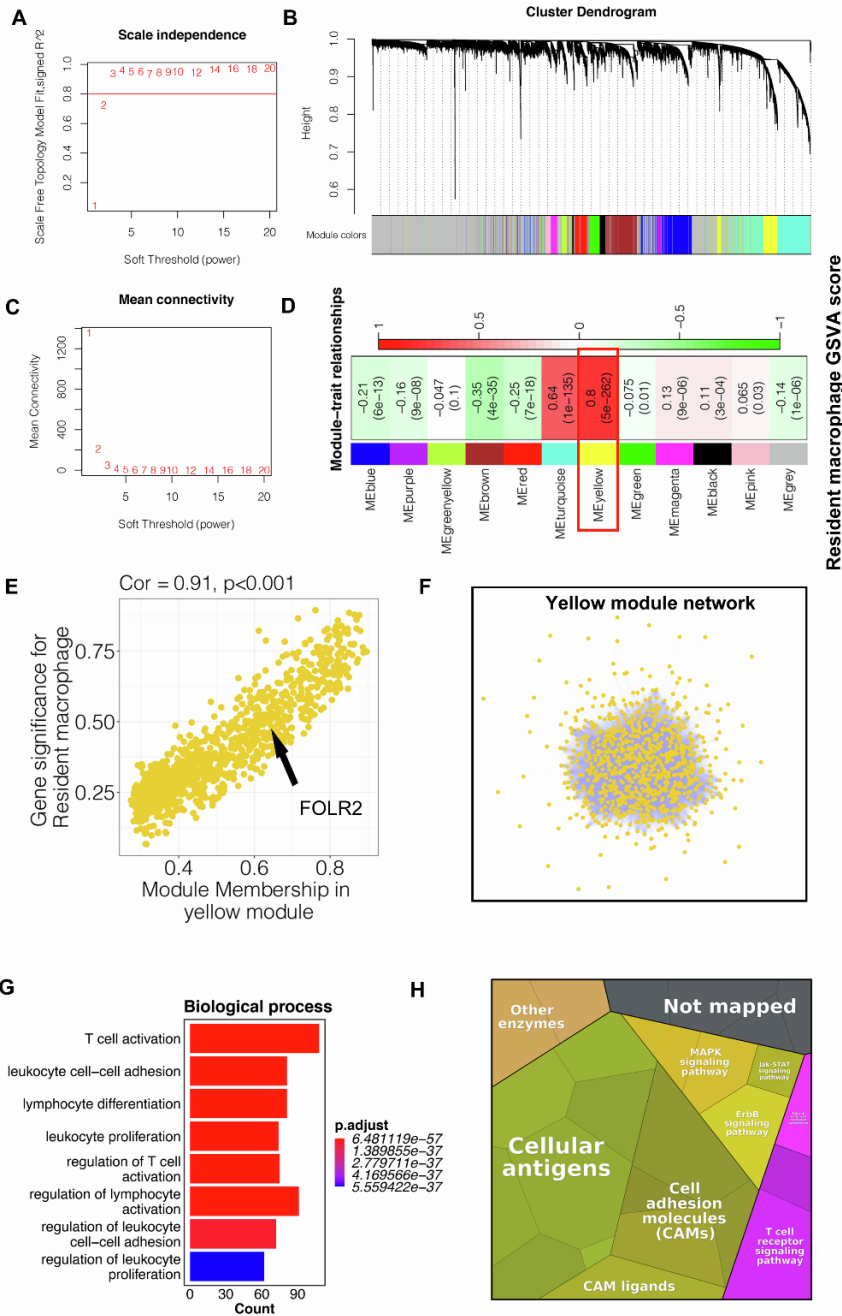

**Fig. S4: Optimal soft threshold selection and sample clustering in WGCNA, related to Figure 5.** A.) A power of  $\beta = 3$  was chosen as the optimal soft threshold to ensure scale-free coexpression. B.) A power of  $\beta = 3$  represents low mean connectivity in the WGCNA model. C.) The clustering of gene modules in WGCNA. D.) The association between identified modules and FOLR2<sup>+</sup> macrophage abundance calculated with the FOLR2<sup>+</sup> macrophage gene signature on the bulk transcriptome. The colour key from green to red indicates the relative correlation level from low to high. E.) The correlation between gene significance for FOLR2<sup>+</sup> macrophages and module membership in the yellow module. The black arrow indicates that FOLR2 is involved in the yellow module. Network clustering identified 11 non-grey (meaningful) gene modules. F.) The gene network in the yellow module. G.) Gene ontology analysis based on the genes within the yellow module (FOLR2<sup>+</sup> macrophage-related module) indicating the enriched biological process. H.) Proteomaps pathway analysis of genes within the yellow module (FOLR2<sup>+</sup> macrophage-related module). Each small polygon corresponds to a single KEGG pathway, and the size correlates with the number of genes involved in the pathway. *WGCNA*: weighted gene coexpression network analysis, *KEGG*: Kyoto Encyclopedia of Genes and Genomes.

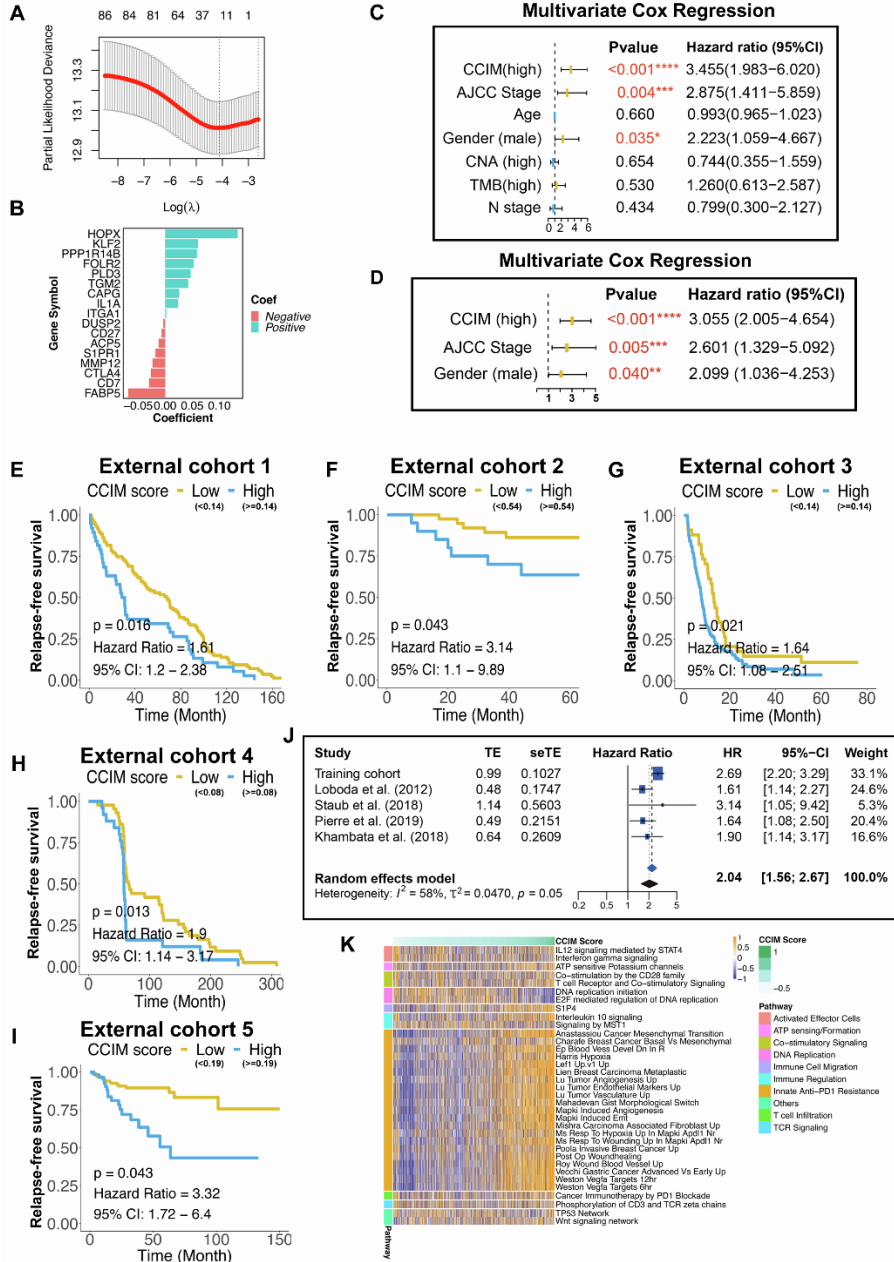

**Fig. S5: Construction of the CCIM scoring system, related to Figure 5.** A.) The LASSO Cox regression model was used to identify the most robust markers. B.) Distribution of LASSO coefficients of the gene signature. C.) Multivariate survival analysis of the CCIM score and other clinicopathological features in the TCGA-CRC cohort. D.) Multivariate survival analysis of the CCIM score and other significant clinicopathological features in the TCGA-CRC cohort. E.) The CCIM score stratified patients with poor prognosis in independent CRC cohort #1 (GSE28722) (Pts n = 125). F.) The CCIM score stratified patients with poor prognosis in independent CRC cohort #2 (GSE12945) (Pts n = 62). G.) The CCIM score stratified patients with a poor prognosis in independent CRC cohort #3 (GSE72970) (Pts n = 124). H.) The CCIM score stratified patients with a poor prognosis in independent CRC cohort #4 (GSE5851) (Pts n = 80). For Figure S5E-S5I best-cutoff method was applied for generating the CCIM high and low group. I.) The CCIM score stratified patients with a poor prognosis in independent CRC cohort #5 (TCGA-CRC) (Pts n = 274). J.) Meta-analysis for the training and testing cohorts. Immune-related pathway alterations in patients with distinct CCIM scores. K.) The pathway alterations were assessed with the GSEA method using their gene sets. *CCIM: colorectal cancer immunosuppressive module; LASSO: least absolute shrinkage and selection operator, CRC: colorectal cancer; pts: patients.*

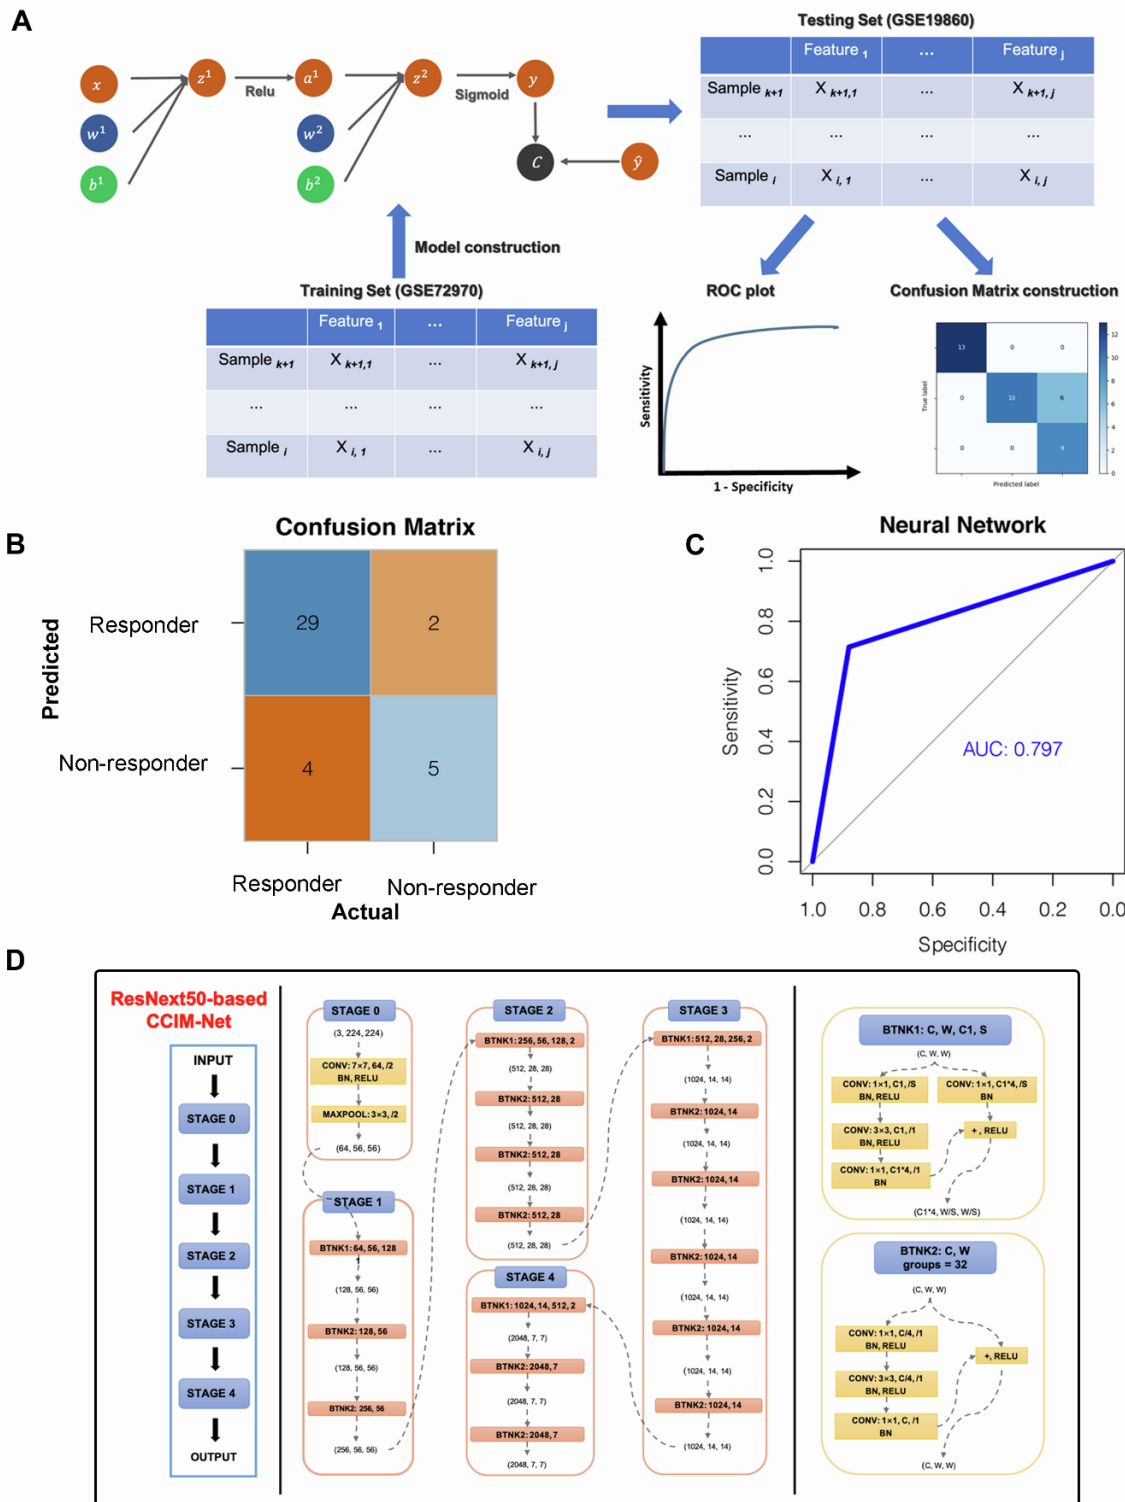

**Fig. S6: A FOLR2<sup>+</sup> macrophage signature-based neural network model predicts the chemotherapy response, related to Figure 6.** A.) Schematic illustration of FOLR2<sup>+</sup> macrophage signature prediction model construction and validation. B.) The confusion matrix for predicting the chemotherapy response by the FOLR2-RM model in an external cohort. The column indicates the predicted response, while the row represents the actual response. C.) The ROC analysis indicates the high sensitivity and specificity of the FOLR2-RM model. D.) The construction process of CCIM-Net by Resnext50. *ROC*: receiver operating characteristic; *FOLR2-RM model*: FOLR2<sup>+</sup> macrophage-based model.

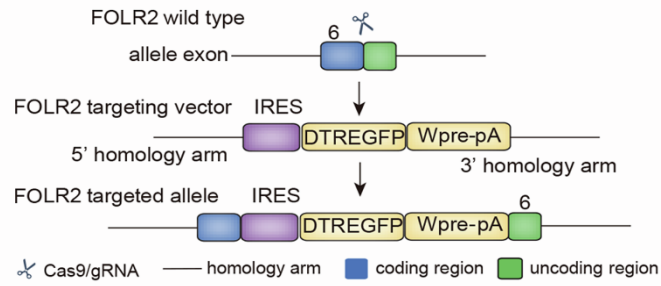

**Fig. S7: The genomic schematic of editing the FOLR2-DTR-eGFP mice and gating strategy, related to Figure 7. The IRES-DTR-EGFP fusion gene was inserted into the 3'-UTR region of the FOLR2 gene locus.**



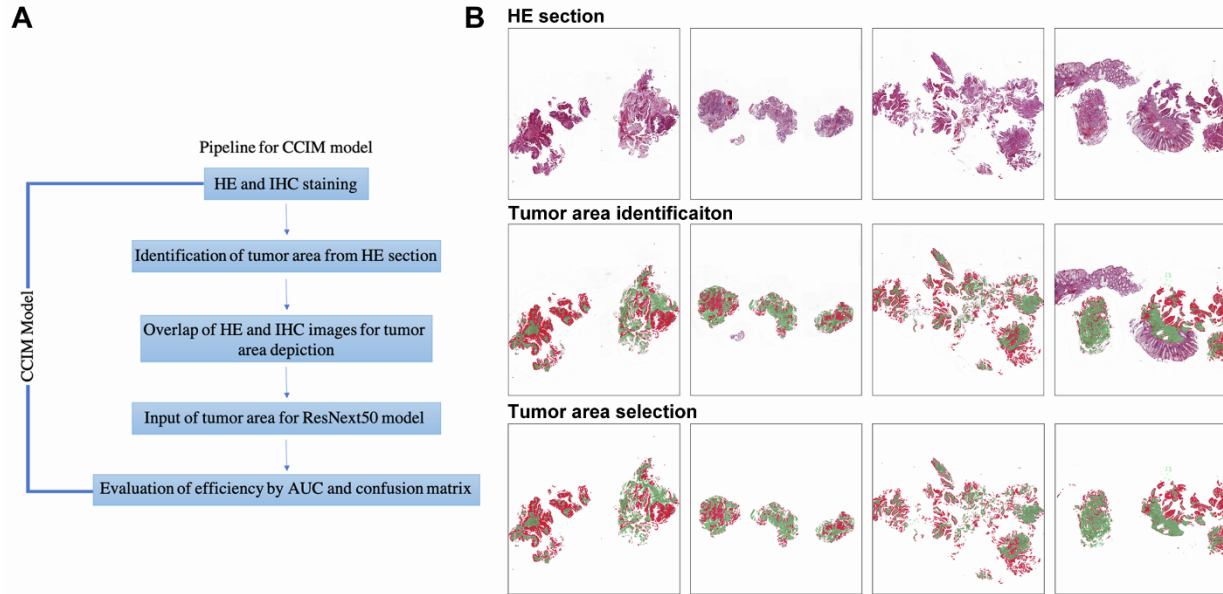

**Fig. S8: The pipeline for the CCIM analysis, related to Figure 6.** A.) The workflow for the deep learning pipeline in our manuscript. B.) The HE staining showing the identified tumor tissues (red indicates tumor cells and green indicates stroma cells) and para-tumor tissues on slides.

**Table S1. Feature genes of myeloid cells. Related to Figure 2.**

| <b>p_val</b> | <b>avg_log2FC</b> | <b>p_val_adj</b> | <b>cluster</b>                | <b>gene</b> |
|--------------|-------------------|------------------|-------------------------------|-------------|
| 0            | 2.703467872       | 0                | FOLR2 <sup>+</sup> macrophage | APOE        |
| 0            | 2.569652735       | 0                | FOLR2 <sup>+</sup> macrophage | C1QC        |
| 0            | 2.540618403       | 0                | FOLR2 <sup>+</sup> macrophage | C1QB        |
| 0            | 2.520762997       | 0                | FOLR2 <sup>+</sup> macrophage | APOC1       |
| 0            | 2.478060246       | 0                | FOLR2 <sup>+</sup> macrophage | C1QA        |
| 0            | 2.156237286       | 0                | FOLR2 <sup>+</sup> macrophage | GPNMB       |
| 0            | 2.114256761       | 0                | FOLR2 <sup>+</sup> macrophage | RNASE1      |
| 0            | 1.806018055       | 0                | FOLR2 <sup>+</sup> macrophage | LGMN        |
| 0            | 1.702743808       | 0                | FOLR2 <sup>+</sup> macrophage | TREM2       |
| 0            | 1.63946639        | 0                | FOLR2 <sup>+</sup> macrophage | MSR1        |
| 0            | 1.790280153       | 0                | OAS <sup>+</sup> macrophage   | IFI44L      |
| 0            | 1.38366812        | 0                | OAS <sup>+</sup> macrophage   | OAS1        |
| 0            | 1.367907875       | 0                | OAS <sup>+</sup> macrophage   | OAS3        |
| 0            | 1.200912655       | 0                | OAS <sup>+</sup> macrophage   | CXCL10      |
| 1.74E-304    | 1.251750284       | 3.47E-301        | OAS <sup>+</sup> macrophage   | OASL        |
| 1.14E-280    | 1.740158953       | 2.28E-277        | OAS <sup>+</sup> macrophage   | TNFSF10     |
| 5.00E-272    | 2.076296858       | 9.99E-269        | OAS <sup>+</sup> macrophage   | MX1         |
| 1.48E-258    | 1.910414263       | 2.96E-255        | OAS <sup>+</sup> macrophage   | LY6E        |
| 1.89E-228    | 1.618872411       | 3.77E-225        | OAS <sup>+</sup> macrophage   | MT2A        |
| 1.87E-212    | 2.16275357        | 3.73E-209        | OAS <sup>+</sup> macrophage   | IFIT1       |
| 0            | 4.326570465       | 0                | Mast cell                     | TPSAB1      |
| 0            | 4.151640883       | 0                | Mast cell                     | TPSB2       |
| 0            | 3.719794919       | 0                | Mast cell                     | CPA3        |
| 0            | 3.528531605       | 0                | Mast cell                     | CLU         |
| 0            | 3.179552215       | 0                | Mast cell                     | HPGDS       |
| 0            | 3.08481101        | 0                | Mast cell                     | MS4A2       |
| 0            | 2.956581136       | 0                | Mast cell                     | GATA2       |
| 0            | 2.915095278       | 0                | Mast cell                     | LTC4S       |
| 3.13E-298    | 2.22089356        | 6.27E-295        | Mast cell                     | CD9         |
| 5.56E-288    | 2.600934127       | 1.11E-284        | Mast cell                     | VWA5A       |
| 0            | 2.314578538       | 0                | FCN1 <sup>+</sup> monocytes   | S100A12     |
| 0            | 1.675024369       | 0                | FCN1 <sup>+</sup> monocytes   | FCN1        |
| 0            | 1.443611669       | 0                | FCN1 <sup>+</sup> monocytes   | RBP7        |
| 0            | 1.407530861       | 0                | FCN1 <sup>+</sup> monocytes   | VCAN        |
| 0            | 1.224845612       | 0                | FCN1 <sup>+</sup> monocytes   | CSTA        |
| 0            | 1.201167533       | 0                | FCN1 <sup>+</sup> monocytes   | S100A8      |
| 0            | 1.109381689       | 0                | FCN1 <sup>+</sup> monocytes   | CLEC12A     |
| 0            | 1.064708839       | 0                | FCN1 <sup>+</sup> monocytes   | CFP         |
| 0            | 1.047715341       | 0                | FCN1 <sup>+</sup> monocytes   | S100A9      |

|           |             |           |                              |          |
|-----------|-------------|-----------|------------------------------|----------|
| 0         | 1.01710355  | 0         | FCN1 <sup>+</sup> monocytes  | PLBD1    |
| 0         | 1.806616701 | 0         | OLR1 <sup>+</sup> macrophage | CCL20    |
| 0         | 1.371324968 | 0         | OLR1 <sup>+</sup> macrophage | CXCL3    |
| 0         | 1.328000606 | 0         | OLR1 <sup>+</sup> macrophage | PLIN2    |
| 0         | 1.313447691 | 0         | OLR1 <sup>+</sup> macrophage | G0S2     |
| 0         | 1.229211049 | 0         | OLR1 <sup>+</sup> macrophage | NLRP3    |
| 0         | 1.212277595 | 0         | OLR1 <sup>+</sup> macrophage | CXCL8    |
| 0         | 1.168625057 | 0         | OLR1 <sup>+</sup> macrophage | UPP1     |
| 0         | 1.150691165 | 0         | OLR1 <sup>+</sup> macrophage | EREG     |
| 1.02E-292 | 1.432863049 | 2.04E-289 | OLR1 <sup>+</sup> macrophage | OLR1     |
| 2.09E-275 | 1.019056865 | 4.17E-272 | OLR1 <sup>+</sup> macrophage | TIMP1    |
| 0         | 1.631095239 | 0         | DC cell                      | HLA-DQA1 |
| 0         | 1.390455704 | 0         | DC cell                      | HLA-DQB1 |
| 0         | 1.364771189 | 0         | DC cell                      | HLA-DMB  |
| 0         | 1.082507304 | 0         | DC cell                      | HLA-DPB1 |
| 0         | 1.073994585 | 0         | DC cell                      | HLA-DPA1 |
| 2.36E-275 | 1.452689755 | 4.72E-272 | DC cell                      | PPA1     |
| 8.42E-202 | 1.153697115 | 1.68E-198 | DC cell                      | GPR183   |
| 3.01E-191 | 1.060540832 | 6.01E-188 | DC cell                      | UCP2     |
| 1.86E-188 | 1.774782864 | 3.72E-185 | DC cell                      | CLEC10A  |
| 2.28E-170 | 1.211102005 | 4.55E-167 | DC cell                      | CPVL     |
| 2.46E-124 | 0.801642856 | 4.93E-121 | HSPA6 <sup>+</sup> monocytes | PI3      |
| 5.59E-69  | 0.751508145 | 1.12E-65  | HSPA6 <sup>+</sup> monocytes | SLPI     |
| 1.04E-52  | 0.508773665 | 2.08E-49  | HSPA6 <sup>+</sup> monocytes | LRRC25   |
| 1.15E-37  | 0.499143034 | 2.30E-34  | HSPA6 <sup>+</sup> monocytes | FOS      |
| 7.02E-37  | 0.767185495 | 1.40E-33  | HSPA6 <sup>+</sup> monocytes | LRG1     |
| 8.01E-33  | 0.457828519 | 1.60E-29  | HSPA6 <sup>+</sup> monocytes | S100A6   |
| 4.74E-32  | 0.633038698 | 9.49E-29  | HSPA6 <sup>+</sup> monocytes | ZFAND2A  |
| 3.00E-27  | 0.479852005 | 6.00E-24  | HSPA6 <sup>+</sup> monocytes | CXCR4    |
| 2.10E-25  | 0.874316719 | 4.21E-22  | HSPA6 <sup>+</sup> monocytes | HSPA6    |
| 7.76E-24  | 0.598128716 | 1.55E-20  | HSPA6 <sup>+</sup> monocytes | HCAR3    |

**Table S2. Feature genes of CD4<sup>+</sup> T cells. Related to Figure 4.**

| <b>p_val</b> | <b>avg_log2FC</b> | <b>p_val_adj</b> | <b>cluster</b> | <b>gene</b> |
|--------------|-------------------|------------------|----------------|-------------|
| 0            | 2.10186081        | 0                | Treg           | IL2RA       |
| 0            | 1.861650068       | 0                | Treg           | FOXP3       |
| 0            | 1.836449779       | 0                | Treg           | TNFRSF18    |
| 0            | 1.744619545       | 0                | Treg           | TNFRSF4     |
| 0            | 1.591211126       | 0                | Treg           | BATF        |
| 0            | 1.573961766       | 0                | Treg           | LAIR2       |
| 0            | 1.529423238       | 0                | Treg           | TNFRSF9     |
| 0            | 1.454852486       | 0                | Treg           | DUSP4       |
| 0            | 1.38027878        | 0                | Treg           | TIGIT       |
| 0            | 1.210566934       | 0                | Treg           | CTLA4       |
| 0            | 1.525099519       | 0                | Naive          | CCR7        |
| 7.99E-284    | 1.271369831       | 1.60E-280        | Naive          | MAL         |
| 1.40E-252    | 0.496372502       | 2.81E-249        | Naive          | PABPC1      |
| 6.67E-208    | 0.920624495       | 1.33E-204        | Naive          | PLAC8       |
| 3.22E-189    | 0.508841364       | 6.43E-186        | Naive          | LDHB        |
| 4.45E-178    | 0.702815017       | 8.90E-175        | Naive          | YPEL5       |
| 1.74E-168    | 0.912903959       | 3.49E-165        | Naive          | AREG        |
| 7.86E-151    | 0.624424222       | 1.57E-147        | Naive          | GPR183      |
| 2.12E-143    | 0.721272861       | 4.23E-140        | Naive          | SLC2A3      |
| 2.71E-139    | 0.620338115       | 5.42E-136        | Naive          | FOS         |
| 0            | 1.3892901         | 0                | Th17           | CCL5        |
| 0            | 1.188210898       | 0                | Th17           | ANXA1       |
| 0            | 0.931498989       | 0                | Th17           | GPR171      |
| 1.79E-292    | 0.92752317        | 3.58E-289        | Th17           | KLRB1       |
| 2.55E-285    | 0.72817835        | 5.10E-282        | Th17           | IL7R        |
| 1.47E-284    | 0.940234127       | 2.94E-281        | Th17           | FKBP11      |
| 1.66E-283    | 0.953685169       | 3.33E-280        | Th17           | ID2         |
| 6.20E-280    | 1.011205571       | 1.24E-276        | Th17           | ANKRD28     |
| 4.59E-244    | 0.954412521       | 9.18E-241        | Th17           | GPR65       |
| 1.32E-234    | 0.970994223       | 2.63E-231        | Th17           | IL17A       |
| 1.45E-149    | 1.288450419       | 2.90E-146        | Exhaust        | PDCD1       |
| 4.28E-146    | 0.937759753       | 8.55E-143        | Exhaust        | TIGIT       |
| 9.08E-146    | 1.444081009       | 1.82E-142        | Exhaust        | TOX2        |
| 9.98E-127    | 1.282741513       | 2.00E-123        | Exhaust        | ICA1        |
| 5.59E-115    | 0.767821251       | 1.12E-111        | Exhaust        | LIMS1       |
| 3.93E-107    | 0.888092037       | 7.86E-104        | Exhaust        | TBC1D4      |
| 8.71E-105    | 0.872393829       | 1.74E-101        | Exhaust        | SH2D1A      |
| 6.01E-100    | 0.763778656       | 1.20E-96         | Exhaust        | MAF         |
| 2.05E-90     | 0.622782937       | 4.09E-87         | Exhaust        | ITM2A       |

|           |             |             |         |         |
|-----------|-------------|-------------|---------|---------|
| 5.32E-75  | 1.568188242 | 1.06E-71    | Exhaust | CXCL13  |
| 4.84E-249 | 2.754926942 | 9.68E-246   | Memory  | TMEM204 |
| 5.75E-20  | 0.639291027 | 1.15E-16    | Memory  | GIMAP7  |
| 4.56E-17  | 0.49324668  | 9.11E-14    | Memory  | RPS4Y1  |
| 1.80E-16  | 0.59686813  | 3.61E-13    | Memory  | GIMAP4  |
| 1.82E-14  | 0.392548485 | 3.63E-11    | Memory  | IL7R    |
| 8.93E-14  | 0.691505443 | 1.79E-10    | Memory  | PLAC8   |
| 7.00E-13  | 0.27137293  | 1.40E-09    | Memory  | LDHB    |
| 1.75E-12  | 0.403172704 | 3.50E-09    | Memory  | ANXA1   |
| 2.72E-08  | 0.410434881 | 5.43E-05    | Memory  | TRAT1   |
| 1.42E-07  | 0.639850827 | 0.000284346 | Memory  | CCR7    |

---

**Table S3. Feature genes of CD8<sup>+</sup> T cells. Related to Figure 4.**

| <b>p_val</b> | <b>avg_log2FC</b> | <b>p_val_adj</b> | <b>cluster</b>  | <b>gene</b> |
|--------------|-------------------|------------------|-----------------|-------------|
| 0            | 2.200701212       | 0                | Effector memory | GZMK        |
| 0            | 1.30252866        | 0                | Effector memory | SH2D1A      |
| 0            | 1.21816221        | 0                | Effector memory | ITGB2       |
| 0            | 1.023573045       | 0                | Effector memory | CD27        |
| 0            | 0.830763101       | 0                | Effector memory | CD74        |
| 8.73E-271    | 0.867991915       | 1.75E-267        | Effector memory | HLA-DPB1    |
| 7.68E-255    | 1.167004015       | 1.54E-251        | Effector memory | GZMH        |
| 8.49E-215    | 0.782787791       | 1.70E-211        | Effector memory | GPR183      |
| 2.64E-200    | 0.678554339       | 5.27E-197        | Effector memory | CCR7        |
| 5.64E-177    | 0.864636785       | 1.13E-173        | Effector memory | HLA-DRA     |
| 0            | 1.894683286       | 0                | Exhaust         | TMIGD2      |
| 0            | 1.85965092        | 0                | Exhaust         | CD160       |
| 0            | 1.459115224       | 0                | Exhaust         | LDLRAD4     |
| 0            | 1.317366481       | 0                | Exhaust         | HOPX        |
| 0            | 1.169102265       | 0                | Exhaust         | KLRD1       |
| 0            | 0.937885175       | 0                | Exhaust         | CD7         |
| 1.54E-291    | 1.66042112        | 3.09E-288        | Exhaust         | SPRY1       |
| 6.94E-291    | 1.146572869       | 1.39E-287        | Exhaust         | GPR65       |
| 9.10E-285    | 1.224418415       | 1.82E-281        | Exhaust         | ITGA1       |
| 3.62E-283    | 0.908541583       | 7.24E-280        | Exhaust         | CD63        |
| 3.02E-196    | 1.276163725       | 6.03E-193        | Exhaust NKT     | HAVCR2      |
| 2.89E-175    | 1.846789084       | 5.78E-172        | Exhaust NKT     | CXCL13      |
| 3.98E-171    | 1.839221638       | 7.96E-168        | Exhaust NKT     | GNLY        |
| 4.34E-170    | 1.093208479       | 8.67E-167        | Exhaust NKT     | ENTPD1      |
| 5.70E-156    | 1.101150394       | 1.14E-152        | Exhaust NKT     | PHLDA1      |
| 4.11E-154    | 1.284014249       | 8.23E-151        | Exhaust NKT     | GZMB        |
| 5.07E-136    | 0.995602299       | 1.01E-132        | Exhaust NKT     | DUSP4       |
| 5.73E-125    | 0.821779459       | 1.15E-121        | Exhaust NKT     | CD70        |
| 2.60E-119    | 0.766485572       | 5.19E-116        | Exhaust NKT     | ACP5        |
| 2.37E-89     | 0.776973157       | 4.74E-86         | Exhaust NKT     | CD9         |
| 0            | 2.405764276       | 0                | Tissue resident | ZNF683      |
| 7.47E-49     | 0.509462029       | 1.49E-45         | Tissue resident | S100A4      |
| 8.58E-39     | 0.54810102        | 1.72E-35         | Tissue resident | GZMB        |
| 6.50E-33     | 0.583926417       | 1.30E-29         | Tissue resident | GZMH        |
| 1.34E-31     | 0.530854143       | 2.68E-28         | Tissue resident | LGALS1      |
| 2.51E-27     | 0.368744099       | 5.02E-24         | Tissue resident | CAPG        |
| 3.64E-25     | 0.487994878       | 7.27E-22         | Tissue resident | HLA-DRA     |
| 5.12E-25     | 0.346868476       | 1.02E-21         | Tissue resident | S100A6      |
| 5.16E-24     | 0.416649564       | 1.03E-20         | Tissue resident | CLU         |

|           |             |           |                 |        |
|-----------|-------------|-----------|-----------------|--------|
| 1.57E-23  | 0.375491203 | 3.15E-20  | Tissue resident | MT2A   |
| 2.62E-165 | 2.310225713 | 5.24E-162 | Tolerant        | DKK3   |
| 3.50E-65  | 1.196683211 | 7.00E-62  | Tolerant        | GZMK   |
| 3.77E-30  | 0.758749457 | 7.53E-27  | Tolerant        | SH2D1A |
| 2.53E-26  | 0.759367969 | 5.07E-23  | Tolerant        | CD27   |
| 9.11E-24  | 0.510185222 | 1.82E-20  | Tolerant        | CST7   |
| 3.34E-22  | 0.571940512 | 6.69E-19  | Tolerant        | GPR183 |
| 6.39E-19  | 0.58504908  | 1.28E-15  | Tolerant        | ITGB2  |
| 5.54E-18  | 0.529356191 | 1.11E-14  | Tolerant        | TRAT1  |
| 5.87E-17  | 0.414195428 | 1.17E-13  | Tolerant        | DUSP2  |
| 1.14E-15  | 0.66396579  | 2.27E-12  | Tolerant        | CCR7   |

---

**Table S4. Cell-cell interaction pairs. Related to Figure 5.**

| Ligand | Receptor | Interaction.type | LRscore | Ligand_cell                   | Receptor_cell              |
|--------|----------|------------------|---------|-------------------------------|----------------------------|
| CD86   | CTLA4    | paracrine        | 0.958   | FOLR2 <sup>+</sup> macrophage | Treg                       |
| CXCL16 | CXCR6    | paracrine        | 0.946   | FOLR2 <sup>+</sup> macrophage | Treg                       |
| MRC1   | PTPRC    | paracrine        | 0.933   | FOLR2 <sup>+</sup> macrophage | Treg                       |
| CD80   | CTLA4    | paracrine        | 0.933   | FOLR2 <sup>+</sup> macrophage | Treg                       |
| SPP1   | ITGA4    | paracrine        | 0.915   | FOLR2 <sup>+</sup> macrophage | Treg                       |
| CD14   | ITGA4    | paracrine        | 0.913   | FOLR2 <sup>+</sup> macrophage | Treg                       |
| ICAM1  | IL2RG    | paracrine        | 0.900   | FOLR2 <sup>+</sup> macrophage | Treg                       |
| LGALS1 | PTPRC    | paracrine        | 0.899   | FOLR2 <sup>+</sup> macrophage | Treg                       |
| IL18   | IL18R1   | paracrine        | 0.894   | FOLR2 <sup>+</sup> macrophage | Treg                       |
| CCL20  | CCR6     | paracrine        | 0.893   | FOLR2 <sup>+</sup> macrophage | Treg                       |
| F13A1  | ITGA4    | paracrine        | 0.891   | FOLR2 <sup>+</sup> macrophage | Treg                       |
| FN1    | ITGA4    | paracrine        | 0.890   | FOLR2 <sup>+</sup> macrophage | Treg                       |
| IL1RN  | IL1R1    | paracrine        | 0.881   | FOLR2 <sup>+</sup> macrophage | Treg                       |
| IL1B   | IL1R1    | paracrine        | 0.879   | FOLR2 <sup>+</sup> macrophage | Treg                       |
| VCAN   | SELL     | paracrine        | 0.851   | FOLR2 <sup>+</sup> macrophage | Treg                       |
| TGM2   | ITGA4    | paracrine        | 0.841   | FOLR2 <sup>+</sup> macrophage | Treg                       |
| CALM2  | SELL     | paracrine        | 0.832   | FOLR2 <sup>+</sup> macrophage | Treg                       |
| VCAN   | ITGA4    | paracrine        | 0.819   | FOLR2 <sup>+</sup> macrophage | Treg                       |
| THBS1  | ITGA4    | paracrine        | 0.789   | FOLR2 <sup>+</sup> macrophage | Treg                       |
| SPP1   | S1PR1    | paracrine        | 0.750   | FOLR2 <sup>+</sup> macrophage | Treg                       |
| C3     | IFITM1   | paracrine        | 0.737   | FOLR2 <sup>+</sup> macrophage | Treg                       |
| IL1A   | IL1R1    | paracrine        | 0.697   | FOLR2 <sup>+</sup> macrophage | Treg                       |
| MRC1   | PTPRC    | paracrine        | 0.935   | FOLR2 <sup>+</sup> macrophage | Exhaust CD8 <sup>+</sup> T |
| CXCL16 | CXCR6    | paracrine        | 0.922   | FOLR2 <sup>+</sup> macrophage | Exhaust CD8 <sup>+</sup> T |
| LGALS1 | CD69     | paracrine        | 0.919   | FOLR2 <sup>+</sup> macrophage | Exhaust CD8 <sup>+</sup> T |
| LGALS1 | PTPRC    | paracrine        | 0.902   | FOLR2 <sup>+</sup> macrophage | Exhaust CD8 <sup>+</sup> T |
| SPP1   | ITGA4    | paracrine        | 0.902   | FOLR2 <sup>+</sup> macrophage | Exhaust CD8 <sup>+</sup> T |
| CD14   | ITGA4    | paracrine        | 0.899   | FOLR2 <sup>+</sup> macrophage | Exhaust CD8 <sup>+</sup> T |
| ICAM1  | IL2RG    | paracrine        | 0.883   | FOLR2 <sup>+</sup> macrophage | Exhaust CD8 <sup>+</sup> T |
| IL18   | CD48     | paracrine        | 0.876   | FOLR2 <sup>+</sup> macrophage | Exhaust CD8 <sup>+</sup> T |
| F13A1  | ITGA4    | paracrine        | 0.874   | FOLR2 <sup>+</sup> macrophage | Exhaust CD8 <sup>+</sup> T |
| FN1    | ITGA4    | paracrine        | 0.872   | FOLR2 <sup>+</sup> macrophage | Exhaust CD8 <sup>+</sup> T |
| IL18   | IL18R1   | paracrine        | 0.818   | FOLR2 <sup>+</sup> macrophage | Exhaust CD8 <sup>+</sup> T |
| TGM2   | ITGA4    | paracrine        | 0.818   | FOLR2 <sup>+</sup> macrophage | Exhaust CD8 <sup>+</sup> T |
| VCAN   | ITGA4    | paracrine        | 0.794   | FOLR2 <sup>+</sup> macrophage | Exhaust CD8 <sup>+</sup> T |
| THBS1  | ITGA4    | paracrine        | 0.760   | FOLR2 <sup>+</sup> macrophage | Exhaust CD8 <sup>+</sup> T |
| C3     | IFITM1   | paracrine        | 0.724   | FOLR2 <sup>+</sup> macrophage | Exhaust CD8 <sup>+</sup> T |
| CD86   | CTLA4    | paracrine        | 0.940   | FOLR2 <sup>+</sup> macrophage | Exhaust CD4 <sup>+</sup> T |
| MRC1   | PTPRC    | paracrine        | 0.937   | FOLR2 <sup>+</sup> macrophage | Exhaust CD4 <sup>+</sup> T |



|        |        |           |       |                               |                             |
|--------|--------|-----------|-------|-------------------------------|-----------------------------|
| SPP1   | ITGA4  | paracrine | 0.920 | FOLR2 <sup>+</sup> macrophage | Exhaust CD4 <sup>+</sup> T  |
| CD14   | ITGA4  | paracrine | 0.918 | FOLR2 <sup>+</sup> macrophage | Exhaust CD4 <sup>+</sup> T  |
| CD80   | CTLA4  | paracrine | 0.906 | FOLR2 <sup>+</sup> macrophage | Exhaust CD4 <sup>+</sup> T  |
| LGALS1 | PTPRC  | paracrine | 0.905 | FOLR2 <sup>+</sup> macrophage | Exhaust CD4 <sup>+</sup> T  |
| CXCL16 | CXCR6  | paracrine | 0.902 | FOLR2 <sup>+</sup> macrophage | Exhaust CD4 <sup>+</sup> T  |
| F13A1  | ITGA4  | paracrine | 0.897 | FOLR2 <sup>+</sup> macrophage | Exhaust CD4 <sup>+</sup> T  |
| FN1    | ITGA4  | paracrine | 0.896 | FOLR2 <sup>+</sup> macrophage | Exhaust CD4 <sup>+</sup> T  |
| LGALS1 | CD69   | paracrine | 0.886 | FOLR2 <sup>+</sup> macrophage | Exhaust CD4 <sup>+</sup> T  |
| ICAM1  | IL2RG  | paracrine | 0.885 | FOLR2 <sup>+</sup> macrophage | Exhaust CD4 <sup>+</sup> T  |
| TGM2   | ITGA4  | paracrine | 0.850 | FOLR2 <sup>+</sup> macrophage | Exhaust CD4 <sup>+</sup> T  |
| VCAN   | ITGA4  | paracrine | 0.829 | FOLR2 <sup>+</sup> macrophage | Exhaust CD4 <sup>+</sup> T  |
| C3     | IFITM1 | paracrine | 0.826 | FOLR2 <sup>+</sup> macrophage | Exhaust CD4 <sup>+</sup> T  |
| CCL20  | CCR6   | paracrine | 0.824 | FOLR2 <sup>+</sup> macrophage | Exhaust CD4 <sup>+</sup> T  |
| IL18   | CD48   | paracrine | 0.823 | FOLR2 <sup>+</sup> macrophage | Exhaust CD4 <sup>+</sup> T  |
| THBS1  | ITGA4  | paracrine | 0.799 | FOLR2 <sup>+</sup> macrophage | Exhaust CD4 <sup>+</sup> T  |
| SPP1   | S1PR1  | paracrine | 0.774 | FOLR2 <sup>+</sup> macrophage | Exhaust CD4 <sup>+</sup> T  |
| VCAN   | SELL   | paracrine | 0.586 | FOLR2 <sup>+</sup> macrophage | Exhaust CD4 <sup>+</sup> T  |
| CALM2  | SELL   | paracrine | 0.550 | FOLR2 <sup>+</sup> macrophage | Exhaust CD4 <sup>+</sup> T  |
| MRC1   | PTPRC  | paracrine | 0.940 | FOLR2 <sup>+</sup> macrophage | Tolerant CD8 <sup>+</sup> T |
| LGALS1 | PTPRC  | paracrine | 0.910 | FOLR2 <sup>+</sup> macrophage | Tolerant CD8 <sup>+</sup> T |
| CXCL16 | CXCR6  | paracrine | 0.908 | FOLR2 <sup>+</sup> macrophage | Tolerant CD8 <sup>+</sup> T |
| SPP1   | ITGA4  | paracrine | 0.902 | FOLR2 <sup>+</sup> macrophage | Tolerant CD8 <sup>+</sup> T |
| CD14   | ITGA4  | paracrine | 0.899 | FOLR2 <sup>+</sup> macrophage | Tolerant CD8 <sup>+</sup> T |
| LGALS1 | CD69   | paracrine | 0.897 | FOLR2 <sup>+</sup> macrophage | Tolerant CD8 <sup>+</sup> T |
| IL18   | CD48   | paracrine | 0.897 | FOLR2 <sup>+</sup> macrophage | Tolerant CD8 <sup>+</sup> T |
| SPP1   | S1PR1  | paracrine | 0.896 | FOLR2 <sup>+</sup> macrophage | Tolerant CD8 <sup>+</sup> T |
| F13A1  | ITGA4  | paracrine | 0.874 | FOLR2 <sup>+</sup> macrophage | Tolerant CD8 <sup>+</sup> T |
| FN1    | ITGA4  | paracrine | 0.872 | FOLR2 <sup>+</sup> macrophage | Tolerant CD8 <sup>+</sup> T |
| ICAM1  | IL2RG  | paracrine | 0.852 | FOLR2 <sup>+</sup> macrophage | Tolerant CD8 <sup>+</sup> T |
| TGM2   | ITGA4  | paracrine | 0.818 | FOLR2 <sup>+</sup> macrophage | Tolerant CD8 <sup>+</sup> T |
| VCAN   | ITGA4  | paracrine | 0.793 | FOLR2 <sup>+</sup> macrophage | Tolerant CD8 <sup>+</sup> T |
| THBS1  | ITGA4  | paracrine | 0.760 | FOLR2 <sup>+</sup> macrophage | Tolerant CD8 <sup>+</sup> T |
| VCAN   | SELL   | paracrine | 0.743 | FOLR2 <sup>+</sup> macrophage | Tolerant CD8 <sup>+</sup> T |
| CALM2  | SELL   | paracrine | 0.714 | FOLR2 <sup>+</sup> macrophage | Tolerant CD8 <sup>+</sup> T |
| CLEC2B | KLRF1  | paracrine | 0.709 | FOLR2 <sup>+</sup> macrophage | Tolerant CD8 <sup>+</sup> T |

**Table S5. Clinical Characteristics of 1405 CRC Patients Involved in This Study. Related to Figure 5.**

| <b>Characteristics</b>    | <b>Number of patients (n =1405)</b> |
|---------------------------|-------------------------------------|
| <b>Cohort</b>             |                                     |
| GSE14333                  | 290 (20.6%)                         |
| GSE17536                  | 177 (12.6%)                         |
| GSE17537                  | 55 (3.9%)                           |
| GSE33113                  | 96 (6.9%)                           |
| GSE37892                  | 130 (9.3%)                          |
| GSE39582                  | 585 (41.6%)                         |
| GSE56699                  | 72 (5.1%)                           |
| <b>Gender</b>             |                                     |
| Male                      | 719 (51.2%)                         |
| Female                    | 608 (43.3%)                         |
| NA                        | 78 (5.5%)                           |
| <b>Median age (years)</b> | 66.67 (22-97)                       |
| <b>Location</b>           |                                     |
| Left                      | 233 (16.6%)                         |
| Right                     | 82 (5.8%)                           |
| NA                        | 1090 (77.6%)                        |
| <b>Satge</b>              |                                     |
| I                         | 66 (4.7%)                           |
| II                        | 512 (36.4%)                         |
| III                       | 343 (24.4%)                         |
| IV                        | 116 (8.3%)                          |
| NA                        | 368 (26.2%)                         |
| <b>Grade</b>              |                                     |
| I                         | 17 (1.2%)                           |
| II                        | 153 (10.9%)                         |
| III                       | 34 (2.4%)                           |
| NA                        | 1201 (85.5%)                        |
| <b>T stage</b>            |                                     |
| Tis                       | 3                                   |
| T0                        | 1                                   |
| T1                        | 12 (0.8)                            |
| T2                        | 49 (3.5%)                           |
| T3                        | 379 (27%)                           |
| T4                        | 119 (8.5%)                          |
| NA                        | 842 (60%)                           |
| <b>N stage</b>            |                                     |
| N0                        | 314 (22.3%)                         |
| N1                        | 137 (9.8%)                          |
| N2                        | 100 (7.1%)                          |
| N3                        | 6 (0.4%)                            |
| NA                        | 848 (60.4%)                         |
| <b>M stage</b>            |                                     |
| M0                        | 499 (35.5%)                         |
| M1                        | 61 (4.3%)                           |
| NA                        | 845 (60.2%)                         |
| <b>MMR status</b>         |                                     |
| dMMR                      | 77 (5.5%)                           |
| pMMR                      | 459 (32.7%)                         |
| NA                        | 869 (61.8%)                         |
| <b>TP53 status</b>        |                                     |
| Mutation                  | 190 (13.5%)                         |
| Wild                      | 161 (11.5%)                         |
| NA                        | 1054 (75%)                          |

---

|                    |             |
|--------------------|-------------|
| <b>KRAS status</b> |             |
| Mutation           | 217 (15.5%) |
| Wild               | 328 (23.3%) |
| NA                 | 860 (61.2%) |
| <b>BRAF status</b> |             |
| Mutation           | 51 (3.6%)   |
| Wild               | 461 (32.8%) |
| NA                 | 893 (63.6%) |
| <b>Treatment</b>   |             |
| Naive              | 497 (35.4%) |
| Chemotherapy       | 358 (25.5%) |
| NA                 | 550 (39.1%) |

---

**Table S6. Clinical Characteristics of 26 CRC Patients Involved in This Study Related to Figure 1**

| <b>Characteristics</b>          | <b>Number of patients (n = 26)</b> |
|---------------------------------|------------------------------------|
| <b>Gender</b>                   |                                    |
| Male                            | 11 (42.3%)                         |
| Female                          | 15 (57.7%)                         |
| <b>Median age (years)</b>       | 69 (40-89)                         |
| <b>Maximum tumor size</b>       |                                    |
| Small (<38 cm <sup>2</sup> )    | 19 (73.1%)                         |
| Medium (38-69 cm <sup>2</sup> ) | 4 (15.4%)                          |
| Large (>69 cm <sup>2</sup> )    | 4 (15.4%)                          |
| <b>Stage</b>                    |                                    |
| I                               | 1 (3.81%)                          |
| II                              | 13 (50%)                           |
| III                             | 11 (42.3%)                         |
| IV                              | 1 (3.8%)                           |
| <b>Grade</b>                    |                                    |
| Low                             | 3 (11.5%)                          |
| Low or Moderate                 | 4 (15.4%)                          |
| Moderate                        | 15 (57.7%)                         |
| High                            | 4 (15.4%)                          |

---

Data are median (IQR) or n (%).

**Table S7. Clinical Characteristics of 181 CRC Patients Involved in This Study. Related to Figure 6.**

| <b>Characteristics</b>    | <b>Number of patients (n = 181)</b> |
|---------------------------|-------------------------------------|
| <b>Gender</b>             |                                     |
| Male                      | 95 (52.5%)                          |
| Female                    | 86 (47.5%)                          |
| <b>Median age (years)</b> | 62 (21-82)                          |
| <b>Location</b>           |                                     |
| L-CRC                     | 116 (64.1%)                         |
| R-CRC                     | 65 (35.9%)                          |
| <b>KRAS Mutation</b>      |                                     |
| Wild                      | 119 (65.7%)                         |
| Mutation                  | 62 (34.3%)                          |
| <b>Response</b>           |                                     |
| Responder (CR+PR)         | 118 (65.2%)                         |
| Non-responder (SD+PD)     | 63 (34.8%)                          |

Data are median (IQR) or n (%).

R-CRC = right-sided colorectal cancer; L-CRC, left-sided colorectal cancer.

CR = complete response; PR = partial response; PD = progressive disease; SD = stable disease.

**Table S8. Clinical Characteristics of 45 CRC Patients Involved in This Study. Related to Figure 6.**

| <b>Characteristics</b>    | <b>Number of patients (n = 45)</b> |
|---------------------------|------------------------------------|
| <b>Gender</b>             |                                    |
| Male                      | 27 (60%)                           |
| Female                    | 18 (40%)                           |
| <b>Median age (years)</b> | 66 (25-78)                         |
| <b>Location</b>           |                                    |
| LCRC                      | 33 (73.3%)                         |
| RCRC                      | 12 (26.7%)                         |
| <b>KRAS Mutation</b>      |                                    |
| Wild                      | 28 (62.2%)                         |
| Mutation                  | 17 (37.8%)                         |
| <b>Response</b>           |                                    |
| Responder (CR+PR)         | 34 (75.6%)                         |
| Non-responder (SD+PD)     | 11 (24.4%)                         |

Data are median (IQR) or n (%).

R-CRC = right-sided colorectal cancer; L-CRC, left-sided colorectal cancer.

CR = complete response; PR = partial response; PD = progressive disease; SD = stable disease.
